# Supplementary material
Source: PubMed Central journal article supplement (PMC4195232)
Supplement: Supp_Table2.pdf [file Supp_Table2.pdf]

**Supplementary Table 2. Parental Reported Diet and Children's HEI Total Score**

| Independent variable                | Healthy Eating Index |                      |
|-------------------------------------|----------------------|----------------------|
|                                     | Mean (95% CI)        | P value <sup>b</sup> |
| Fruits (1 serving = ½ apple)        |                      |                      |
| Once per week                       | 57.0 (37.0–78.6)     | 0.9                  |
| 2–4 per week                        | 57.1 (37.8–76.7)     | 0.01                 |
| 5–6 per week                        | 63.4 (39.4–80.1)     | 0.5                  |
| Every day                           | 58.9 (38.0–71.3)     | 0.1                  |
| ≥ Twice per day                     | 61.6 (42.0–74.2)     |                      |
| p value for trend <sup>b</sup>      | 0.03 ↑               |                      |
| Vegetables (1 serving = ½ tomato)   |                      |                      |
| Never                               | 55.5 (40.4–72.6)     | 0.1                  |
| Once per week                       | 62.2 (47.7–75.7)     | 0.1                  |
| 2–4 per week                        | 60.9 (39.6–77.8)     | 0.01                 |
| 5–6 per week                        | 66.3 (51.3–75.3)     | 0.1                  |
| Every day                           | 62.2 (50.2–77.0)     | 0.01                 |
| ≥ Twice per day                     | 66.3 (44.7–78.4)     |                      |
| p value for trend <sup>b</sup>      | 0.02 ↑               |                      |
| 100% fruit juice (1 serving = 8 oz) |                      |                      |
| Never                               | 53.4 (37.0–62.6)     | 0.1                  |
| Once per week                       | 59.7 (44.0–75.1)     | 0.1                  |
| 2–4 per week                        | 59.1 (37.8–80.1)     | 0.2                  |
| 5–6 per week                        | 58.1 (39.4–76.3)     | 0.1                  |
| Every day                           | 58.8 (38.0–78.6)     | 0.04                 |
| ≥ Twice per day                     | 61.6 (50.1–68.8)     |                      |
| p value for trend <sup>b</sup>      | 0.2                  |                      |
| Milk (1 serving = 8 oz)             |                      |                      |
| Never                               | 55.7 (49.0–61.8)     | 0.6                  |
| Once per week                       | 58.1 (46.1–74.0)     | 0.4                  |
| 2–4 per week                        | 59.2 (37.0–76.7)     | 0.5                  |
| 5–6 per week                        | 58.3 (38.0–76.3)     | 0.3                  |
| Every day                           | 59.9 (38.0–80.1)     | 0.3                  |
| ≥ Twice per day                     | 59.8 (41.7–78.6)     |                      |
| p value for trend <sup>b</sup>      | 0.3                  |                      |

*continued*

**Supplementary Table 2. Parental Reported Diet and Children's HEI Total Score *continued***

| Independent variable            | HEI              |                      |
|---------------------------------|------------------|----------------------|
|                                 | Mean (95% CI)    | p value <sup>a</sup> |
| Soda (1 serving = 12 oz)        |                  |                      |
| Never                           | 60.9 (37.0–61.8) | 0.8                  |
| Once per week                   | 61.1 (42.0–76.7) | 0.05                 |
| 2–4 per week                    | 57.1 (37.8–78.6) | 0.04                 |
| 5–6 per week                    | 54.1 (38.0–67.7) | 0.1                  |
| Every day                       | 56.2 (46.6–74.5) | 0.5                  |
| ≥ Twice per day                 | 56.7 (53.8–59.6) |                      |
| p value for trend <sup>b</sup>  | 0.007 ↓          |                      |
| Fruit drinks (1 serving = 8 oz) |                  |                      |
| Never                           | 60.6 (37.0–80.1) | 0.5                  |
| Once per week                   | 59.3 (39.4–78.6) | 0.1                  |
| 2–4 per week                    | 57.6 (37.8–71.3) | 0.8                  |
| 5–6 per week                    | 60.0 (40.0–68.9) | 0.1                  |
| Every day                       | 55.8 (38.0–66.8) | 0.3                  |
| ≥ Twice per day                 | 56.6 (46.2–65.2) |                      |
| p value for trend <sup>b</sup>  | 0.09 ↓           |                      |
| Snacks (1 serving = 2 cookies)  |                  |                      |
| Never                           | 61.5 (53.5–72.3) | 0.9                  |
| Once per week                   | 61.5 (37.0–80.1) | 0.3                  |
| 2–4 per week                    | 58.5 (38.0–76.7) | 0.1                  |
| 5–6 per week                    | 56.6 (38.0–69.4) | 0.01                 |
| Every day                       | 52.0 (37.8–65.7) | 0.8                  |
| ≥ Twice per day                 | 60.7 (49.9–73.1) |                      |
| p value for trend <sup>b</sup>  | 0.02 ↓           |                      |

<sup>a</sup>Univariate linear regression models adjusted for children's age and gender; p value for comparing the reference value (never) with every increased frequency category.

<sup>b</sup>p value for trend for the difference in children's HEI total score by parental reported habitual diet (ordinal variables: never to ≥ 2 per day). Directions for trend of associations indicated with arrows for positive (↑) and negative (↓), respectively.

HEI, Healthy Eating Index; CI, confidence interval.
